# Supplementary material for: Self-enhanced electrogenerated chemiluminescence of ruthenium(ii) complexes conjugated with Schiff bases
Source: Royal Society of Chemistry journal article supplement (doi:10.1039/c4dt03310h), 2014-12-02
Supplement: c4dt03310h1.pdf [file c4dt03310h1.pdf]

## Supplementary Information for Self-Enhanced Electrogenerated Chemiluminescence of Ruthenium (II) Complexes Conjugated with Schiff Bases

Panpan Li,<sup>a,b</sup> Zhaoyu Jin,<sup>a</sup> Meilian Zhao,<sup>a</sup> Yanxue Xu,<sup>a</sup> Yong Guo<sup>a</sup> and Dan Xiao<sup>\*,a,c</sup>

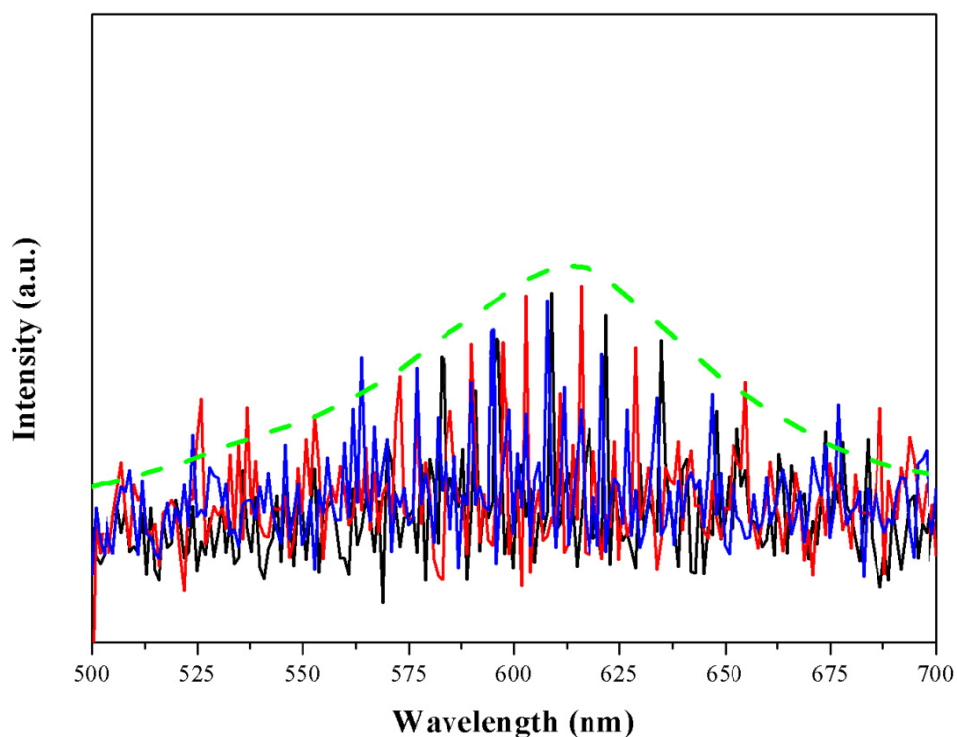

**Fig. S1** ECL spectrum was obtained via CV between -1.4 V and 1.3 V in 0.2 M phosphate buffer solution (pH = 7.2) containing 90  $\mu$ M Ru-PBI.

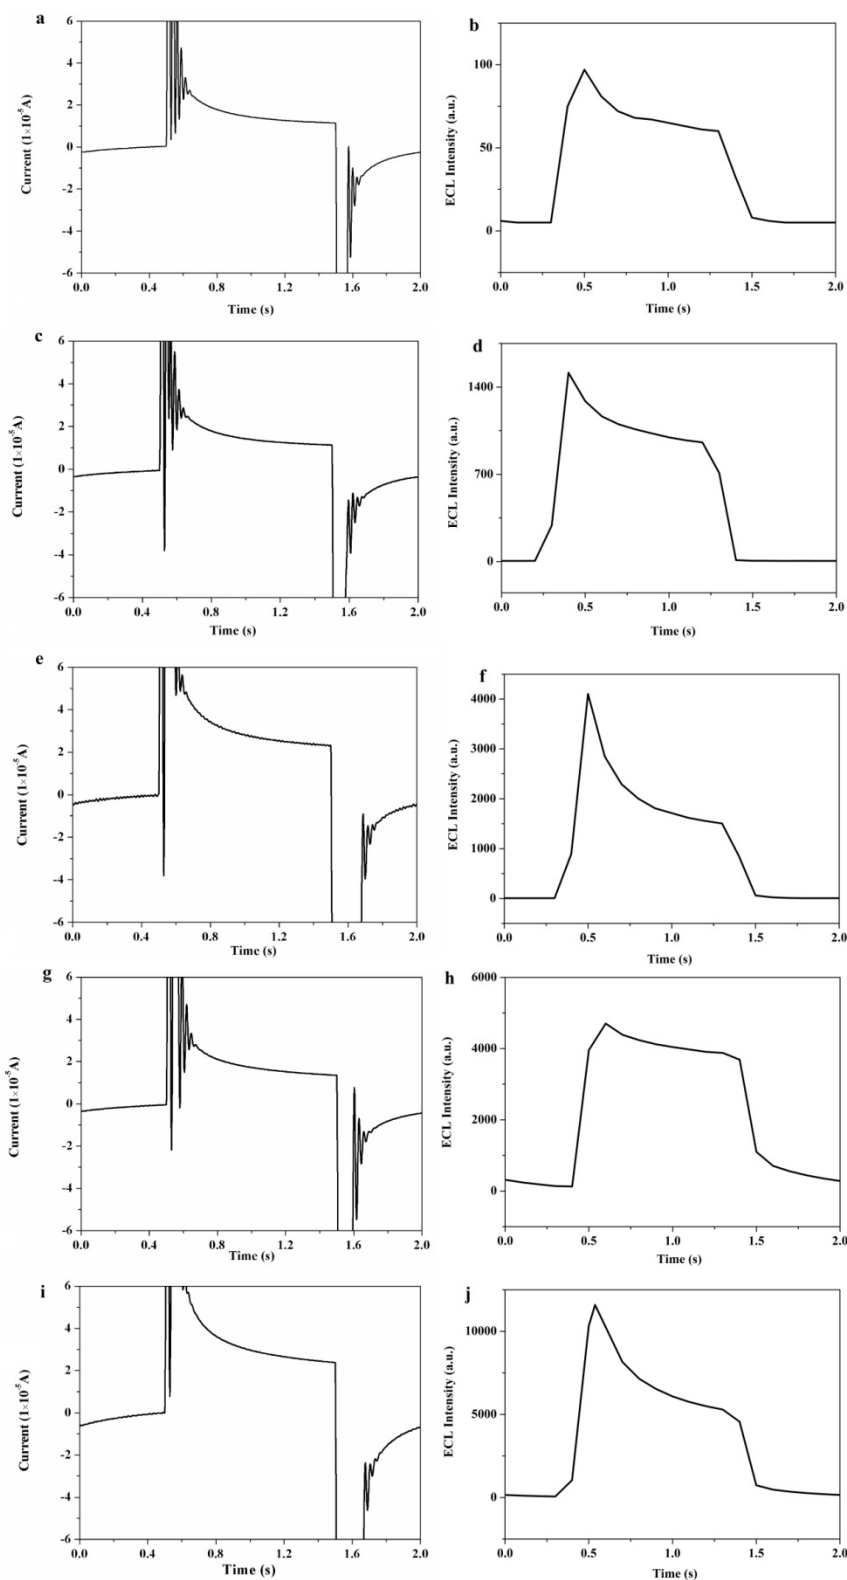

**Fig. S2.** a), c), e), g) and i) were obtained based on step potential chronoamperometry to count coulombs (integral areas of curves), respectively from 0.2 M PBS of 4.5  $\mu\text{M}$  Ru-BP, Ru-PBI-M, Ru-BP with addition of 16  $\mu\text{M}$  TPrA, Ru-PBI-H and Ru-BP with addition of 36  $\mu\text{M}$ . b), d), f), h) and j) were corresponding ECL intensities of a), c), e), g) and i) (integral areas of curves). The applied potential of step potential chronoamperometry is 1.2 V and the pulse time is 1.0 s. All data were gained at room temperature (25  $^{\circ}\text{C}$ )

**Table S1.** The values of integral areas separately.

| Curves      | Integral areas |
|-------------|----------------|
| a ( $Q^0$ ) | 1.88           |
| c ( $Q^1$ ) | 1.81           |
| e ( $Q^2$ ) | 3.49           |
| g ( $Q^3$ ) | 2.22           |
| i ( $Q^4$ ) | 3.71           |
| b ( $I^0$ ) | 79.15          |
| d ( $I^1$ ) | 1113.8         |
| f ( $I^2$ ) | 2131.5         |
| h ( $I^3$ ) | 4506.5         |
| j ( $I^4$ ) | 7374.5         |

**Table S2.** Energy band structures of Ru-BP, Ru-PBI and Ru-PBI-M-Co.

| Complexes                         | Ru-BP  | Ru-PBI | Ru-PBI-Co |
|-----------------------------------|--------|--------|-----------|
| $E^{\text{ox}\theta}$ (V)         | 1.447  | 0.847  | 0.917     |
| $E_{\text{HOMO}}^{\text{a}}$ (eV) | -5.947 | -5.347 | -5.417    |
| $E^{\text{red}\theta}$ (V)        | -1.123 | -0.853 | -0.973    |
| $E_{\text{LUMO}}^{\text{b}}$ (eV) | -3.377 | -3.647 | -3.527    |
| $E_{\text{g}}^{\text{c}}$ (eV)    | 2.57   | 1.70   | 1.89      |
| $E_{\text{HOMO}}^{\text{d}}$ (eV) | -5.967 | -2.299 | —         |
| $E_{\text{LUMO}}^{\text{d}}$ (eV) | -2.492 | -1.465 | —         |
| $E_{\text{g}}^{\text{d}}$ (eV)    | 3.475  | 0.834  | —         |

<sup>a</sup>  $|E_{\text{HOMO}}| = E^{\text{ox}\theta} + 4.5\text{eV}$ ,  $E_{\text{HOMO}} < 0$ .

<sup>b</sup>  $|E_{\text{LUMO}}| = E^{\text{red}\theta} + 4.5\text{eV}$ ,  $E_{\text{LUMO}} < 0$ . Where  $E^{\text{ox}\theta}$  and  $E^{\text{red}\theta}$  are the first oxidation potentials and the first reduction potentials versus NHE.

<sup>c</sup>  $E_{\text{g}} = E_{\text{LUMO}} - E_{\text{HOMO}}$ .

<sup>d</sup> theoretical values obtained via Gaussian09 package.

**Table S3.** Composition (%) of frontier molecular orbitals of Ru-BP and Ru-PBI.

| Complexes     | HOMO    |         |       | LUMO  |       |       |
|---------------|---------|---------|-------|-------|-------|-------|
|               | Ru      | bpy     | PBI   | Ru    | bpy   | PBI   |
| <b>Ru-BP</b>  | 80.27   | 19.73   | —     | 1.229 | 98.77 | —     |
| <b>Ru-PBI</b> | 0.02261 | 0.03739 | 99.94 | 7.603 | 33.65 | 58.75 |

**Table S4.** The coordinates of the optimized structures for Ru-BP and Ru-PBI (the geometries were optimized at the B3LYP/6-31G level in Gaussian09 package).

Coordinates of Ru-BP:

|   |         |         |         |
|---|---------|---------|---------|
| N | 7.7496  | -1.7454 | 16.8376 |
| C | 8.6678  | -2.6395 | 16.3656 |
| C | 8.9443  | -3.8121 | 17.0647 |
| H | 9.5678  | -4.4164 | 16.733  |
| C | 7.1352  | -2.0213 | 18.0011 |
| H | 6.5105  | -1.4163 | 18.3265 |
| C | 8.2924  | -4.0755 | 18.2489 |
| H | 8.4608  | -4.8625 | 18.7128 |
| C | 7.3889  | -3.1611 | 18.7359 |
| H | 6.9577  | -3.3076 | 19.5484 |
| N | 9.0149  | 1.0149  | 16.8376 |
| C | 9.33    | 2.2572  | 16.3656 |
| C | 10.2073 | 3.0829  | 17.0647 |
| H | 10.4189 | 3.9251  | 16.733  |
| C | 9.561   | 0.6208  | 18.0011 |
| H | 9.3494  | -0.2227 | 18.3265 |
| C | 10.7614 | 2.65    | 18.2489 |
| H | 11.3588 | 3.1893  | 18.7128 |
| C | 10.4212 | 1.4104  | 18.7359 |
| H | 10.7637 | 1.1102  | 19.5484 |
| N | 5.9917  | 0.7305  | 16.8376 |
| C | 4.7583  | 0.3823  | 16.3656 |
| C | 3.6046  | 0.7292  | 17.0647 |
| H | 2.7694  | 0.4914  | 16.733  |
| C | 6.06    | 1.4005  | 18.0011 |
| H | 6.8963  | 1.639   | 18.3265 |
| C | 3.7024  | 1.4255  | 18.2489 |
| H | 2.9367  | 1.6732  | 18.7128 |
| C | 4.9461  | 1.7507  | 18.7359 |
| H | 5.0348  | 2.1974  | 19.5484 |
| N | 9.0149  | -1.0149 | 14.6549 |
| C | 9.33    | -2.2572 | 15.1269 |
| C | 10.2073 | -3.0829 | 14.4278 |
| H | 10.4189 | -3.9251 | 14.7595 |
| C | 9.561   | -0.6208 | 13.4914 |
| H | 9.3494  | 0.2227  | 13.166  |
| C | 10.7614 | -2.65   | 13.2436 |
| H | 11.3588 | -3.1893 | 12.7797 |
| C | 10.4212 | -1.4104 | 12.7566 |
| H | 10.7637 | -1.1102 | 11.9441 |

---

|    |        |         |         |
|----|--------|---------|---------|
| N  | 5.9917 | -0.7305 | 14.6549 |
| C  | 4.7583 | -0.3823 | 15.1269 |
| C  | 3.6046 | -0.7292 | 14.4278 |
| H  | 2.7694 | -0.4914 | 14.7595 |
| C  | 6.06   | -1.4005 | 13.4914 |
| H  | 6.8963 | -1.639  | 13.166  |
| C  | 3.7024 | -1.4255 | 13.2436 |
| H  | 2.9367 | -1.6732 | 12.7797 |
| C  | 4.9461 | -1.7507 | 12.7566 |
| H  | 5.0348 | -2.1974 | 11.9441 |
| N  | 7.7496 | 1.7454  | 14.6549 |
| C  | 8.6678 | 2.6395  | 15.1269 |
| C  | 8.9443 | 3.8121  | 14.4278 |
| H  | 9.5678 | 4.4164  | 14.7595 |
| C  | 7.1352 | 2.0213  | 13.4914 |
| H  | 6.5105 | 1.4163  | 13.166  |
| C  | 8.2924 | 4.0755  | 13.2436 |
| H  | 8.4608 | 4.8625  | 12.7797 |
| C  | 7.3889 | 3.1611  | 12.7566 |
| H  | 6.9577 | 3.3076  | 11.9441 |
| Ru | 7.5854 | 0       | 15.7462 |

---

## Coordinates of Ru-PBI:

---

|   |          |          |          |
|---|----------|----------|----------|
| C | -0.63167 | 3.47298  | 0.17784  |
| C | 0.6307   | 2.9154   | 0.06569  |
| C | 0.7593   | 1.50523  | -0.05682 |
| C | -0.43448 | 0.74299  | -0.06764 |
| C | -1.77809 | 2.65132  | 0.15994  |
| C | 2.04004  | 0.85111  | -0.15063 |
| C | -0.38812 | -0.67238 | -0.23472 |
| C | 0.86241  | -1.34424 | -0.3675  |
| C | 2.09779  | -0.57164 | -0.26726 |
| C | 0.79453  | -2.73269 | -0.66038 |
| H | 1.69625  | -3.30059 | -0.83647 |
| C | -0.44368 | -3.36699 | -0.75435 |
| C | -1.6239  | -2.65434 | -0.54451 |
| H | -0.75707 | 4.54538  | 0.2778   |
| H | 1.53809  | 3.5082   | 0.06207  |
| H | -2.77642 | 3.05882  | 0.24266  |
| H | -0.49778 | -4.42406 | -0.98973 |
| H | -2.59861 | -3.11925 | -0.58499 |
| N | -1.60312 | -1.31825 | -0.28875 |
| N | -1.68422 | 1.31592  | 0.02773  |
| C | -5.13442 | -2.38164 | 0.77425  |
| C | -6.1628  | -3.29415 | 0.59576  |
| C | -6.80318 | -3.35908 | -0.66659 |
| C | -6.37612 | -2.52441 | -1.68328 |
| C | -5.31351 | -1.61119 | -1.46928 |
| H | -4.62606 | -2.28059 | 1.72437  |
| H | -6.47313 | -3.92744 | 1.41798  |
| H | -7.61529 | -4.05789 | -0.83563 |
| H | -6.84782 | -2.57225 | -2.65795 |
| C | -4.73144 | -0.77072 | -2.47358 |
| C | -5.15097 | -0.69828 | -3.82612 |
| C | -4.44558 | 0.06091  | -4.74188 |
| H | -6.02863 | -1.25076 | -4.1416  |
| C | -2.92602 | 0.69378  | -2.97911 |
| C | -3.2901  | 0.7625   | -4.31462 |
| H | -4.76825 | 0.11244  | -5.77612 |
| H | -2.06551 | 1.23033  | -2.60065 |
| H | -2.69965 | 1.35016  | -5.00692 |
| C | -5.97496 | 2.40345  | 2.23806  |
| C | -4.98496 | 1.47717  | 1.815    |
| C | -5.47005 | 2.02982  | -0.4455  |
| C | -6.4451  | 2.94012  | -0.06796 |
| C | -6.70047 | 3.12942  | 1.3135   |

---



---

|   |          |          |          |
|---|----------|----------|----------|
| H | -6.15342 | 2.54395  | 3.29763  |
| H | -5.24118 | 1.84992  | -1.48727 |
| H | -7.00007 | 3.48267  | -0.82353 |
| H | -7.45432 | 3.83727  | 1.6411   |
| C | -4.16385 | 0.69616  | 2.69397  |
| C | -4.25249 | 0.70136  | 4.1094   |
| C | -2.34552 | -0.82865 | 2.83926  |
| C | -3.38162 | -0.0544  | 4.87295  |
| H | -5.01166 | 1.30464  | 4.59308  |
| C | -2.39161 | -0.83323 | 4.22536  |
| H | -1.61495 | -1.41646 | 2.29888  |
| H | -3.45474 | -0.04796 | 5.95513  |
| H | -1.68134 | -1.42567 | 4.789    |
| N | -4.70482 | -1.54584 | -0.20993 |
| N | -3.6257  | -0.0197  | -2.05394 |
| N | -4.74165 | 1.30463  | 0.44752  |
| N | -3.206   | -0.10967 | 2.06926  |
| N | 3.35018  | -1.14733 | -0.35886 |
| N | 3.09979  | 1.73765  | -0.10749 |
| C | 3.72729  | -2.31211 | 0.09673  |
| C | 4.36691  | 1.49536  | 0.04593  |
| C | 5.48323  | -4.02567 | 0.43985  |
| C | 6.77592  | -4.52817 | 0.21548  |
| C | 7.67659  | -3.85008 | -0.60217 |
| C | 7.2655   | -2.64684 | -1.20802 |
| C | 5.98752  | -2.144   | -0.99307 |
| C | 5.06645  | -2.82024 | -0.154   |
| H | 8.67308  | -4.23697 | -0.77798 |
| H | 7.95597  | -2.11583 | -1.85481 |
| H | 5.65679  | -1.22851 | -1.46829 |
| C | 7.80748  | 2.99049  | 0.13839  |
| C | 7.57529  | 4.36904  | -0.00729 |
| C | 6.2627   | 4.81118  | -0.13464 |
| C | 5.1695   | 3.9192   | -0.12408 |
| C | 5.39309  | 2.5328   | 0.01901  |
| C | 6.7398   | 2.10254  | 0.15161  |
| H | 8.82384  | 2.62561  | 0.24048  |
| H | 8.40455  | 5.0659   | -0.01736 |
| H | 6.92193  | 1.03785  | 0.26088  |
| O | 4.61454  | -4.7317  | 1.26018  |
| H | 5.0749   | -5.53436 | 1.58537  |
| O | 3.90222  | 4.46164  | -0.24676 |
| H | 4.00517  | 5.43576  | -0.33396 |
| H | 4.74473  | 0.48481  | 0.20287  |

---

---

|    |          |          |          |
|----|----------|----------|----------|
| Ru | -3.26169 | -0.0759  | -0.01181 |
| H  | 3.08858  | -2.93105 | 0.72808  |
| H  | 6.96093  | -5.44873 | 0.72856  |
| H  | 5.96086  | 5.83155  | -0.24707 |

---

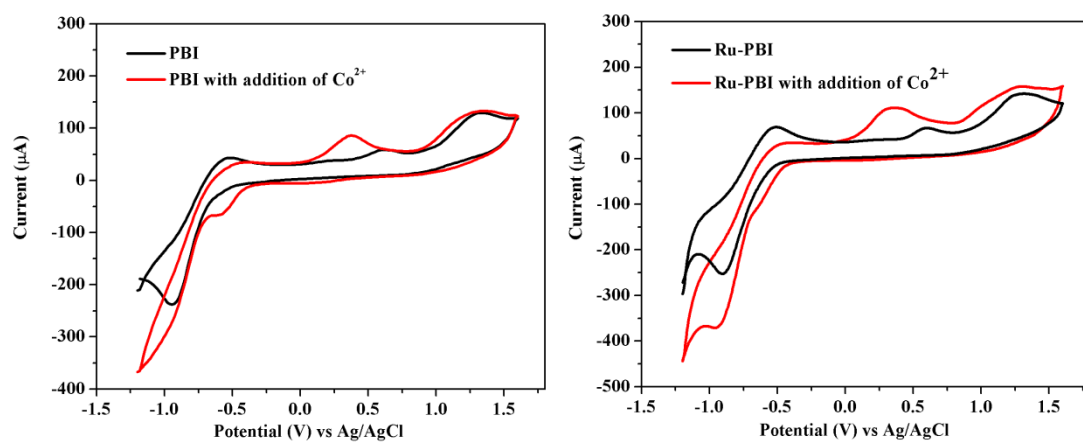

**Fig. S3** CVs of Ru complex and the Schiff base ligand before and after addition of  $\text{Co}^{2+}$  in MeCN (90  $\mu\text{M}$  PBI and Ru-PBI with addition of 180  $\mu\text{M}$   $\text{Co}^{2+}$  respectively, Ag/AgCl electrode as reference, 0.1M  $\text{TBAClO}_4$  as supporting electrolyte) with the scan rate of  $200 \text{ mV s}^{-1}$ .

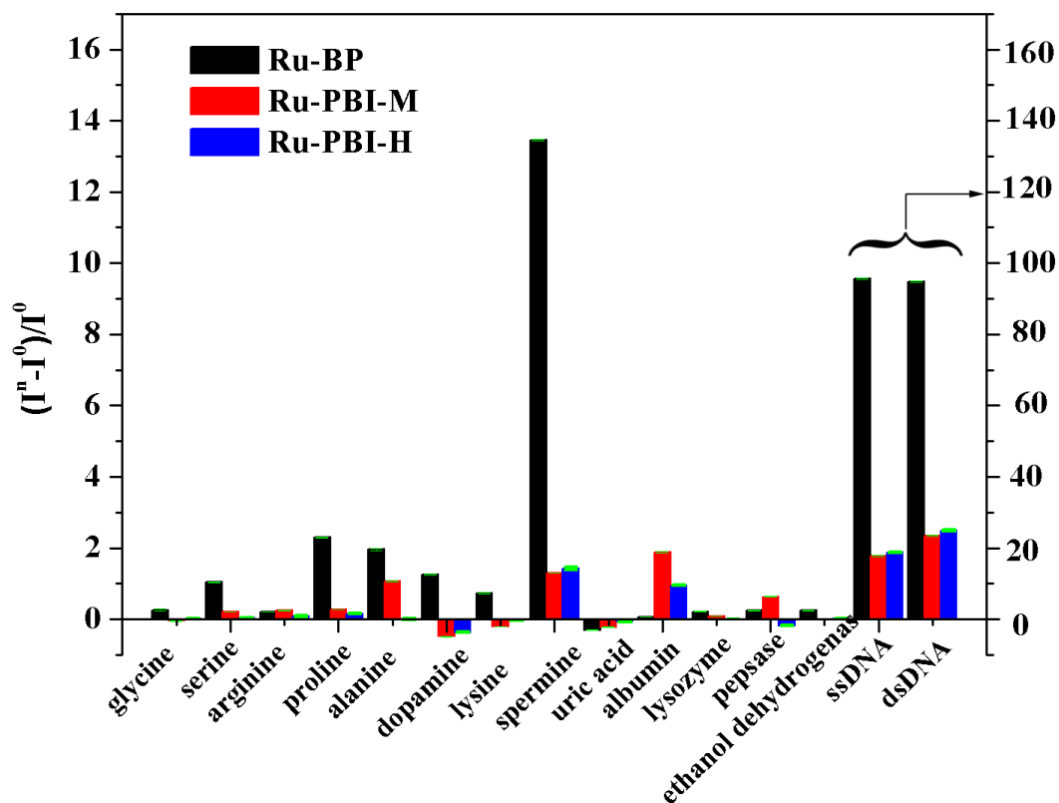

**Fig. S4** Interference of some amine derivatives (glycine, serine, arginine, proline, alanine, dopamine, lysine, spermine and uric acid with the same concentration of 18  $\mu\text{M}$  and albumin, lysozyme, pepsase, ethanol dehydrogenase with 4  $\text{mg L}^{-1}$  and ssDNA, dsDNA with 2  $\mu\text{M}$ ) for ECL intensity of Ru-BP, Ru-PBI-M and Ru-PBI-H ( $I^n$  is the ECL intensity after the addition of 18  $\mu\text{M}$  amine derivatives and  $I^0$  is the initial intensity).

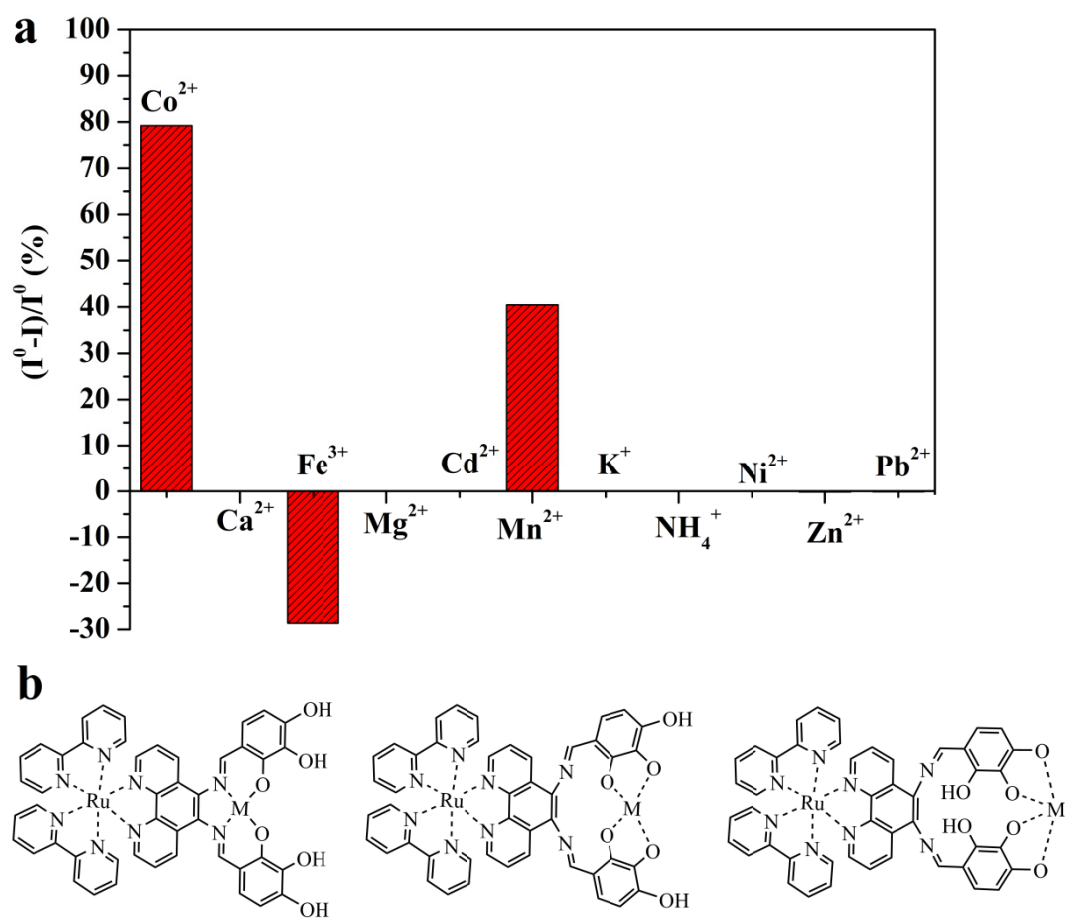

**Fig. S5** a) Quenching efficiency on ECL intensity of 45  $\mu\text{M}$  various metal ions adding to 4.5  $\mu\text{M}$  Ru-PBI-H in 0.2M PBS (pH = 7.2). b) Probable bonding modes of metal ions for Ru-PBI-H.

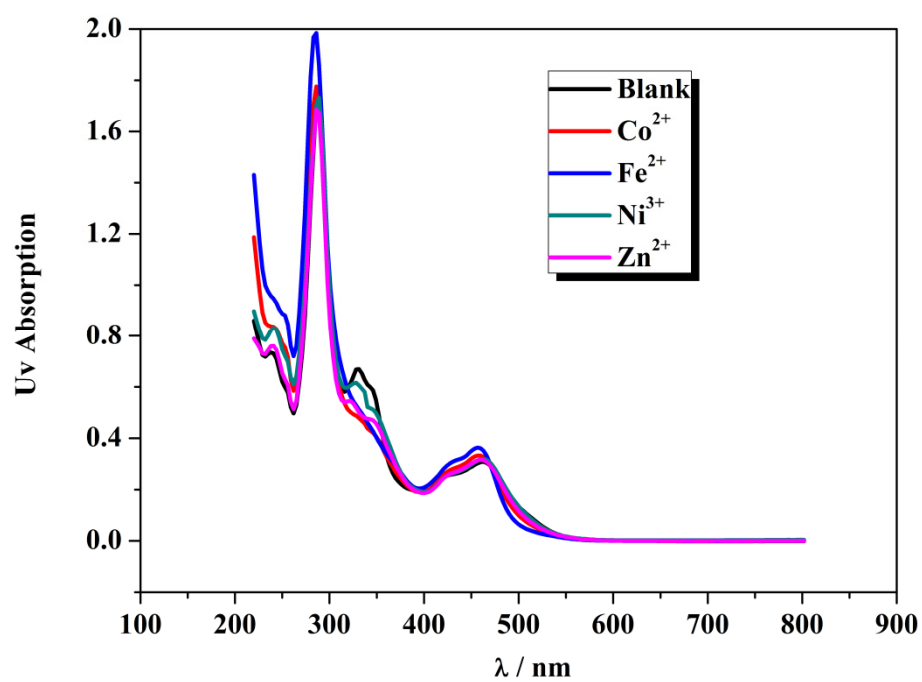

**Fig. S6** UV-Vis spectra of Ru-PBI-M (blank) in ethanol and Ru-PBI-M bonding with  $\text{Co}^{2+}$ ,  $\text{Fe}^{3+}$ ,  $\text{Ni}^{2+}$ ,  $\text{Zn}^{2+}$  (2 eq. metal ions involved related to Ru-PBI-M).

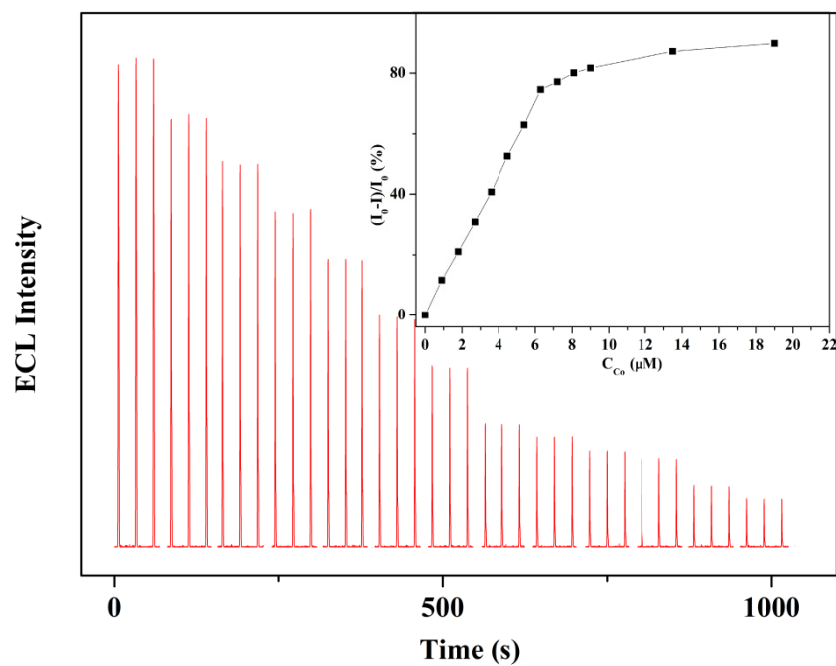

**Fig. S7** ECL peak intensity with the addition of different  $\text{Co}^{2+}$  concentration. Inset is the correlation between the  $\text{Co}^{2+}$  concentration and the ECL quenching efficiency. ECL experiments were conducted in 0.2 M PBS (pH = 7.2) including 4.5  $\mu\text{M}$  Ru-PBI-M.

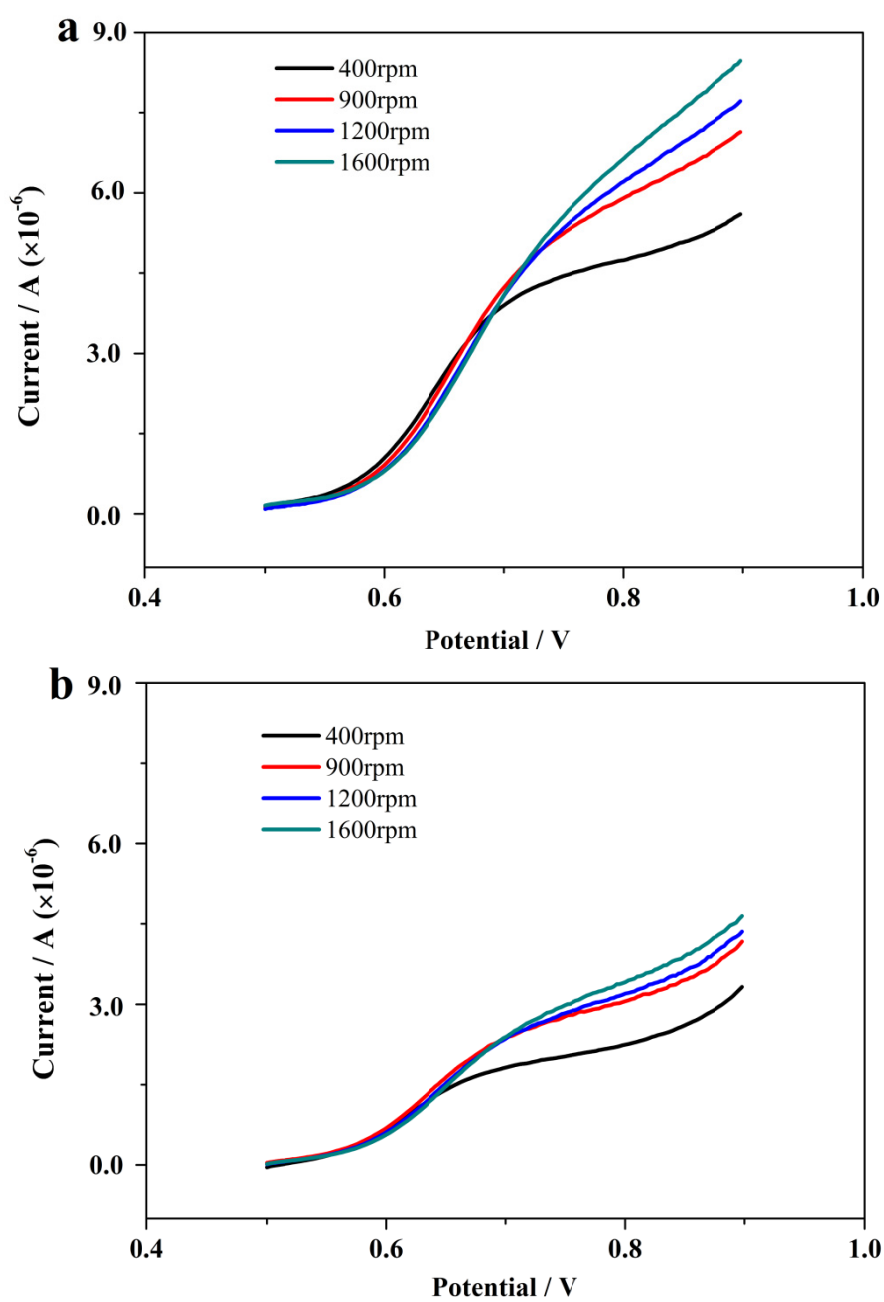

**Fig. S8** Polarization curves of Ru-PBI-M (a) and Ru-PBI-M-Co (b) at different rotation (rates scan rate is kept at  $5 \text{ mV s}^{-1}$ ).



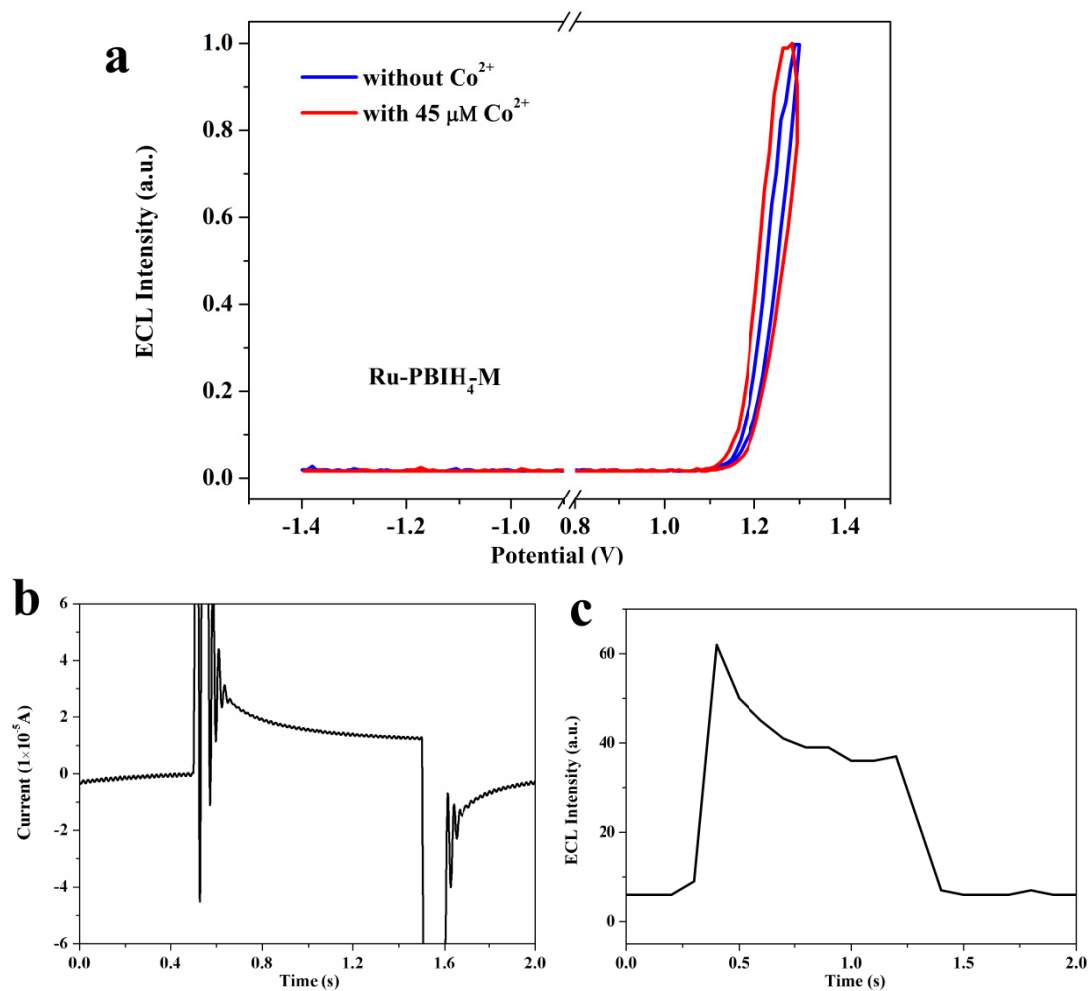

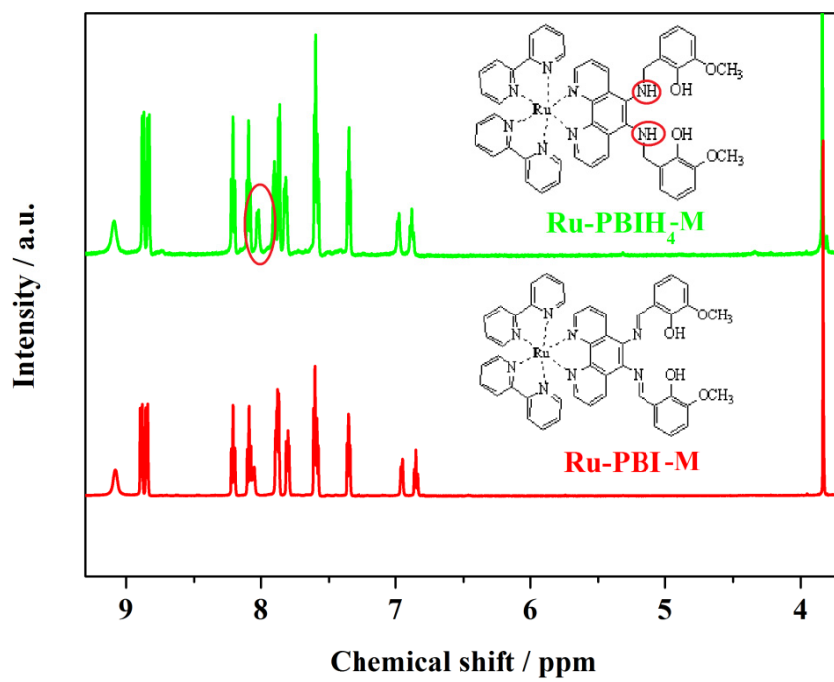

Fig. S10  $^1\text{H}$  NMR of Ru-PBIH<sub>4</sub>-M and Ru-PBI-M.

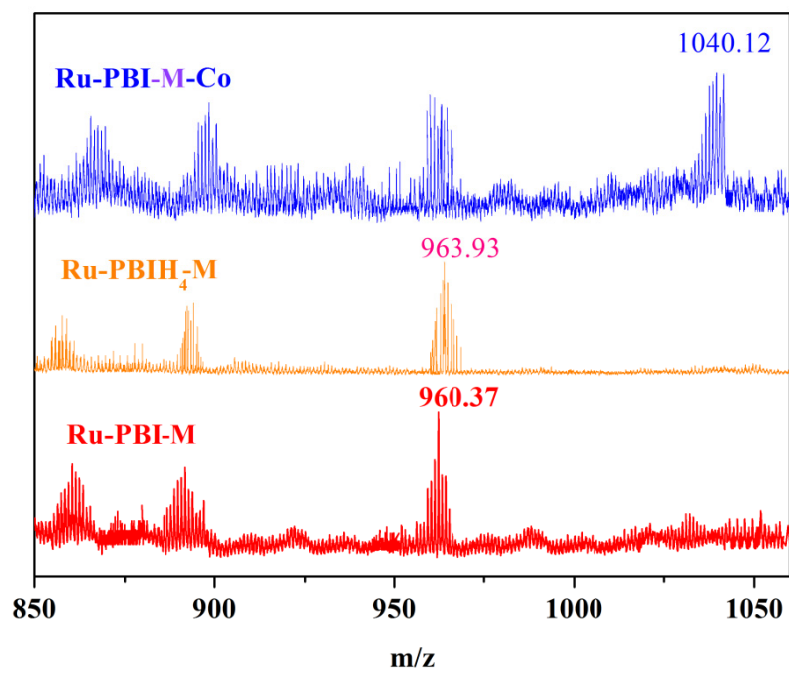

Fig. S11 MALDI-TOF-MS of Ru-PBI-M-Co, Ru-PBIH<sub>4</sub>-M and Ru-PBI-M.
